# Supplementary material
Source: MDPI journal article supplement (https://www.mdpi.com/2079-3197/11/9/181)
Supplement: s1 [file s1]

**Table S1.** Convergence values

| Label &<br>Tolerance (mm) | Element count | Node count | Displacement<br>(mm) | Max. Von Mises Stress<br>(GPa) |
|---------------------------|---------------|------------|----------------------|--------------------------------|
| <b><u>PS200</u></b>       |               |            |                      |                                |
| 0.1                       | 7,052,136     | 11,570,625 | 5.58220e-03          | 0.23                           |
| 0.11                      | 5,610,246     | 9,231,275  | 5.56287e-03          | 0.25                           |
| 0.13                      | 3,704,455     | 6,185,252  | 5.70716e-03          | 0.25                           |
| 0.135                     | 3,389,803     | 5,700,048  | 5.78070e-03          | 0.31                           |
| 0.14                      | 3,168,252     | 5,349,117  | 5.72738e-03          | 0.23                           |
| 0.145                     | 2,750,535     | 4,663,472  | 5.71361e-03          | 0.25                           |
| 0.15                      | 2,539,529     | 4,327,890  | 5.72758e-03          | 0.27                           |
| 0.17                      | 1,716,487     | 3,010,862  | 7.19069e-03          | 0.54                           |
| 0.18                      | 1,514,573     | 2,694,432  | 6.02971e-03          | 0.30                           |
| 0.185                     | 1,403,257     | 2,497,836  | 6.65263e-03          | 0.27                           |
| 0.19                      | 1,227,222     | 2,214,165  | 7.59719e-03          | 0.41                           |
| 0.195                     | 1,225,065     | 2,214,308  | 5.93030e-03          | 0.23                           |
| <b><u>PS350</u></b>       |               |            |                      |                                |
| 0.1                       | 8,386,979     | 12,702,213 | 1.08953e-02          | 0.35                           |
| 0.105                     | 5,789,882     | 9,120,948  | 1.86051e-02          | 0.50                           |
| 0.11                      | 4,998,935     | 7,902,123  | 1.87621e-02          | 0.50                           |
| 0.115                     | 4,408,090     | 7,013,416  | 1.90640e-02          | 0.59                           |
| 0.12                      | 4,776,565     | 7,436,836  | 1.94420e-02          | 0.48                           |
| 0.125                     | 3,492,976     | 5,646,144  | 1.92114e-02          | 0.49                           |
| 0.13                      | 3,038,131     | 4,946,961  | 2.02101e-02          | 0.49                           |
| 0.135                     | 2,738,590     | 4,500,152  | 2.00244e-02          | 0.49                           |
| 0.14                      | 2,385,861     | 3,984,429  | 2.02234e-02          | 0.49                           |
| 0.145                     | 2,156,320     | 3,598,978  | 2.06775e-02          | 0.49                           |
| 0.15                      | 1,983,167     | 3,327,685  | 2.07912e-02          | 0.48                           |
| 0.155                     | 1,808,569     | 3,053,057  | 2.11625e-02          | 0.74                           |

---

|       |           |           |             |      |
|-------|-----------|-----------|-------------|------|
| 0.165 | 1,498,982 | 2,570,742 | 2.24198e-02 | 0.56 |
| 0.17  | 1,326,077 | 2,301,263 | 2.24513e-02 | 0.57 |
| 0.175 | 1,497,422 | 2,520,254 | 2.25711e-02 | 0.52 |
| 0.18  | 1,147,582 | 2,028,287 | 2.36845e-02 | 0.57 |
| 0.185 | 1,104,781 | 1,931,868 | 2.45608e-02 | 0.58 |
| 0.19  | 955,545   | 1,702,279 | 2.52635e-02 | 0.61 |
| 0.195 | 911,897   | 1,638,733 | 2.40936e-02 | 0.53 |
| 0.20  | 924,863   | 1,618,871 | 2.58971e-02 | 0.64 |

**PS550**

|       |           |           |             |      |
|-------|-----------|-----------|-------------|------|
| 0.1   | 2,579,495 | 4,446,577 | 6.35200e-02 | 1.31 |
| 0.105 | 2,299,454 | 3,988,576 | 6.43004e-02 | 1.26 |
| 0.11  | 2,014,059 | 3,509,751 | 6.55061e-02 | 1.34 |
| 0.12  | 1,659,887 | 2,931,490 | 6.82948e-02 | 1.39 |
| 0.13  | 1,292,851 | 2,315,615 | 7.08361e-02 | 1.87 |
| 0.14  | 1,081,493 | 1,973,215 | 7.40556e-02 | 1.57 |
| 0.145 | 949,317   | 1,738,403 | 7.71285e-02 | 2.47 |
| 0.15  | 868,838   | 1,609,898 | 7.87791e-02 | 1.75 |
| 0.17  | 598,147   | 1,146,623 | 9.31271e-02 | 2.13 |
| 0.18  | 537,801   | 1,044,063 | 9.18833e-02 | 1.90 |
| 0.185 | 517,080   | 997,148   | 9.50286e-02 | 1.78 |
| 0.19  | 448,575   | 880,849   | 1.06417e-01 | 2.80 |
| 0.195 | 438,312   | 865,202   | 1.03483e-01 | 1.88 |

**PS750**

|       |           |           |      |      |
|-------|-----------|-----------|------|------|
| 0.1   | 1,791,001 | 3,102,497 | 0.19 | 2.19 |
| 0.11  | 1,353,531 | 2,380,825 | 0.19 | 2.54 |
| 0.115 | 1,232,684 | 2,174,008 | 0.20 | 2.29 |
| 0.13  | 888,102   | 1,599,654 | 0.21 | 2.48 |
| 0.14  | 741,190   | 1,363,030 | 0.22 | 2.71 |
| 0.15  | 607,826   | 1,130,619 | 0.23 | 2.57 |
| 0.17  | 422,993   | 809,449   | 0.28 | 3.13 |
| 0.18  | 378,437   | 734,459   | 0.29 | 3.56 |
| 0.185 | 366,922   | 708,276   | 0.28 | 3.24 |
| 0.19  | 316,043   | 619,653   | 0.33 | 4.38 |

---

|                      |           |           |      |       |
|----------------------|-----------|-----------|------|-------|
| 0.195                | 306,102   | 606,240   | 0.31 | 3.78  |
| <b><u>PS1000</u></b> |           |           |      |       |
| 0.1                  | 1,155,452 | 2,032,425 | 0.73 | 6.82  |
| 0.11                 | 901,633   | 1,604,096 | 0.76 | 6.93  |
| 0.12                 | 740,100   | 1,338,062 | 0.80 | 7.32  |
| 0.13                 | 574,729   | 1,053,506 | 0.86 | 7.83  |
| 0.14                 | 492,720   | 916,985   | 0.90 | 8.38  |
| 0.145                | 431,504   | 808,385   | 0.95 | 8.35  |
| 0.15                 | 398,660   | 752,361   | 1    | 8.76  |
| 0.17                 | 285,270   | 550,699   | 1.19 | 9.84  |
| 0.18                 | 253,741   | 498,280   | 1.30 | 12.56 |
| 0.185                | 242,227   | 472,784   | 1.35 | 13.54 |
| 0.19                 | 213,262   | 422,369   | 1.43 | 14.67 |
| 0.195                | 205,619   | 411,602   | 1.60 | 15.05 |

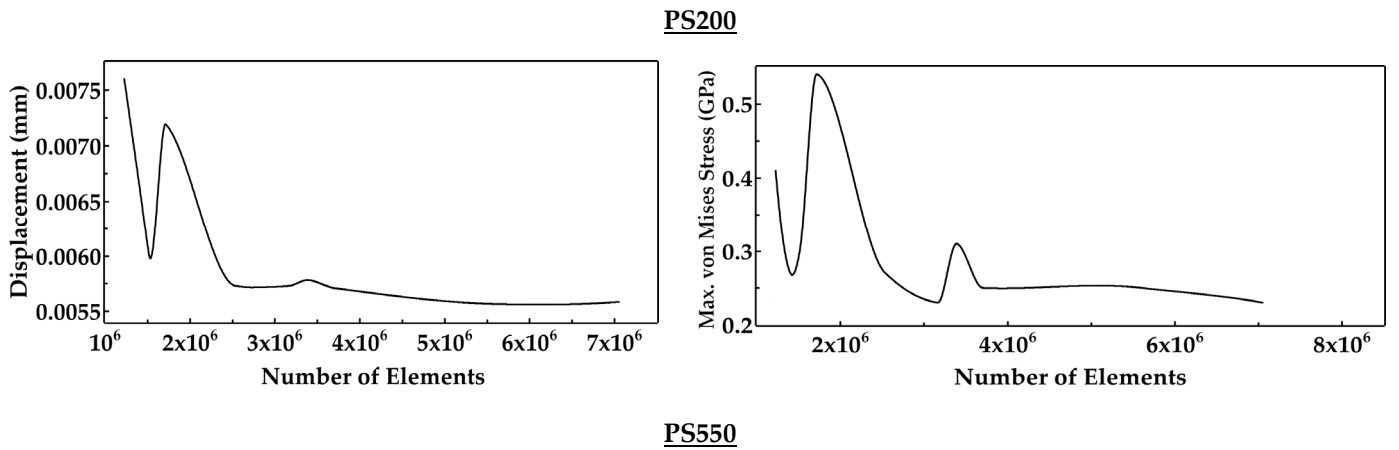

**PS550**

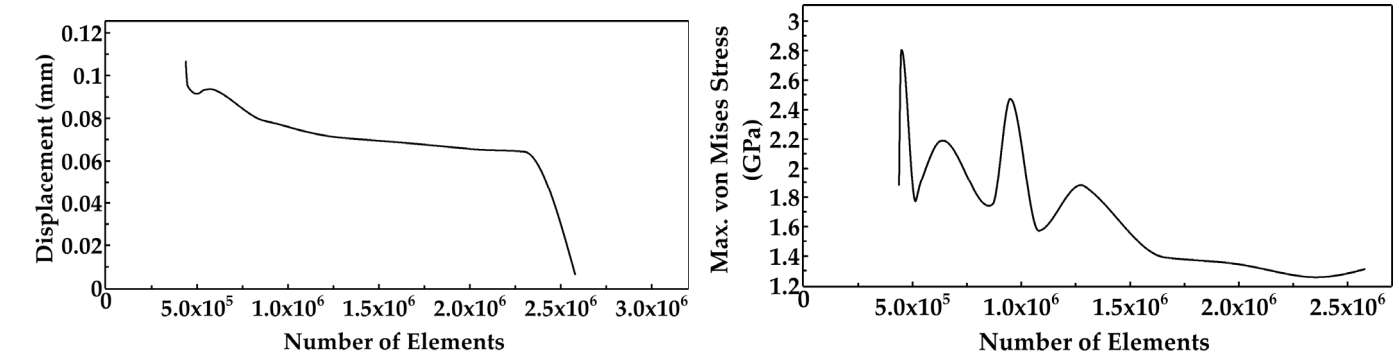

PS 750

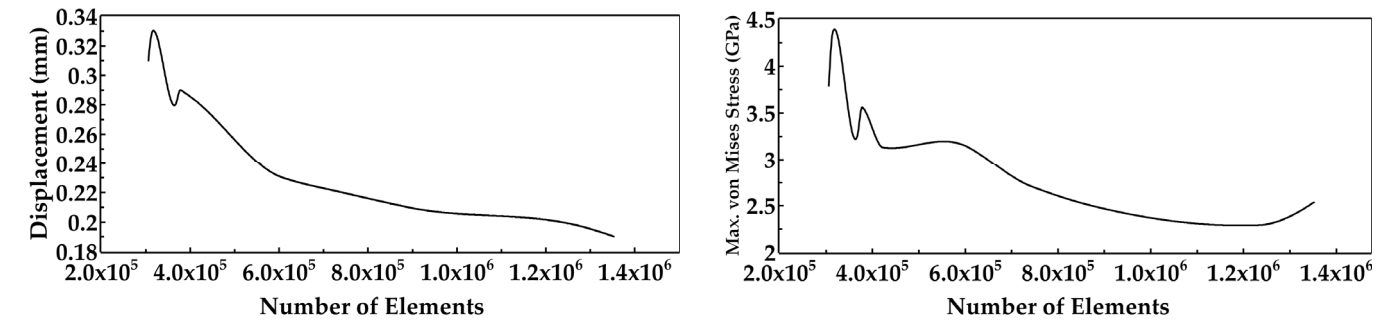

PS1000

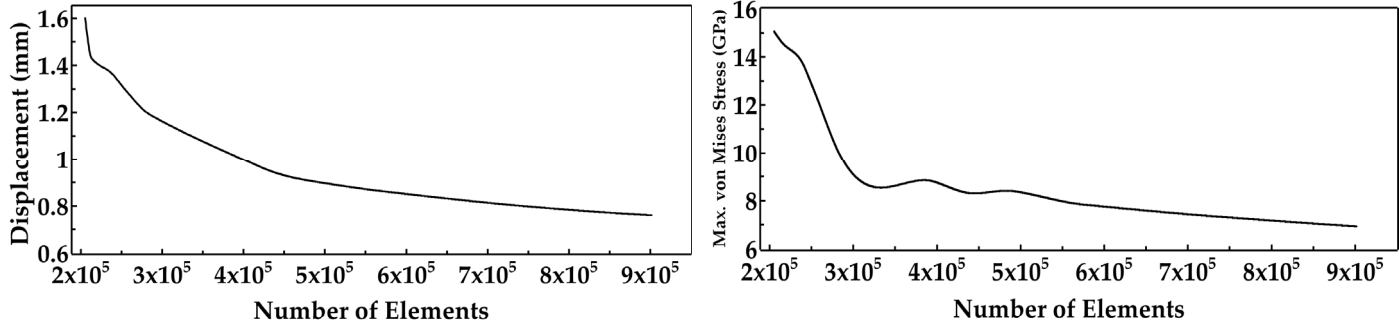

Figure S1. Convergence plots  
Miscellaneous von Mises & Displacement contours

Table S2. von Mises contours of PS200, PS550, PS750, and PS1000 from the FE simulation. (von Mises contour of PS350 in the main article)

| Label | von Mises Stress Contour (GPa) |
|-------|--------------------------------|
|-------|--------------------------------|



PS200

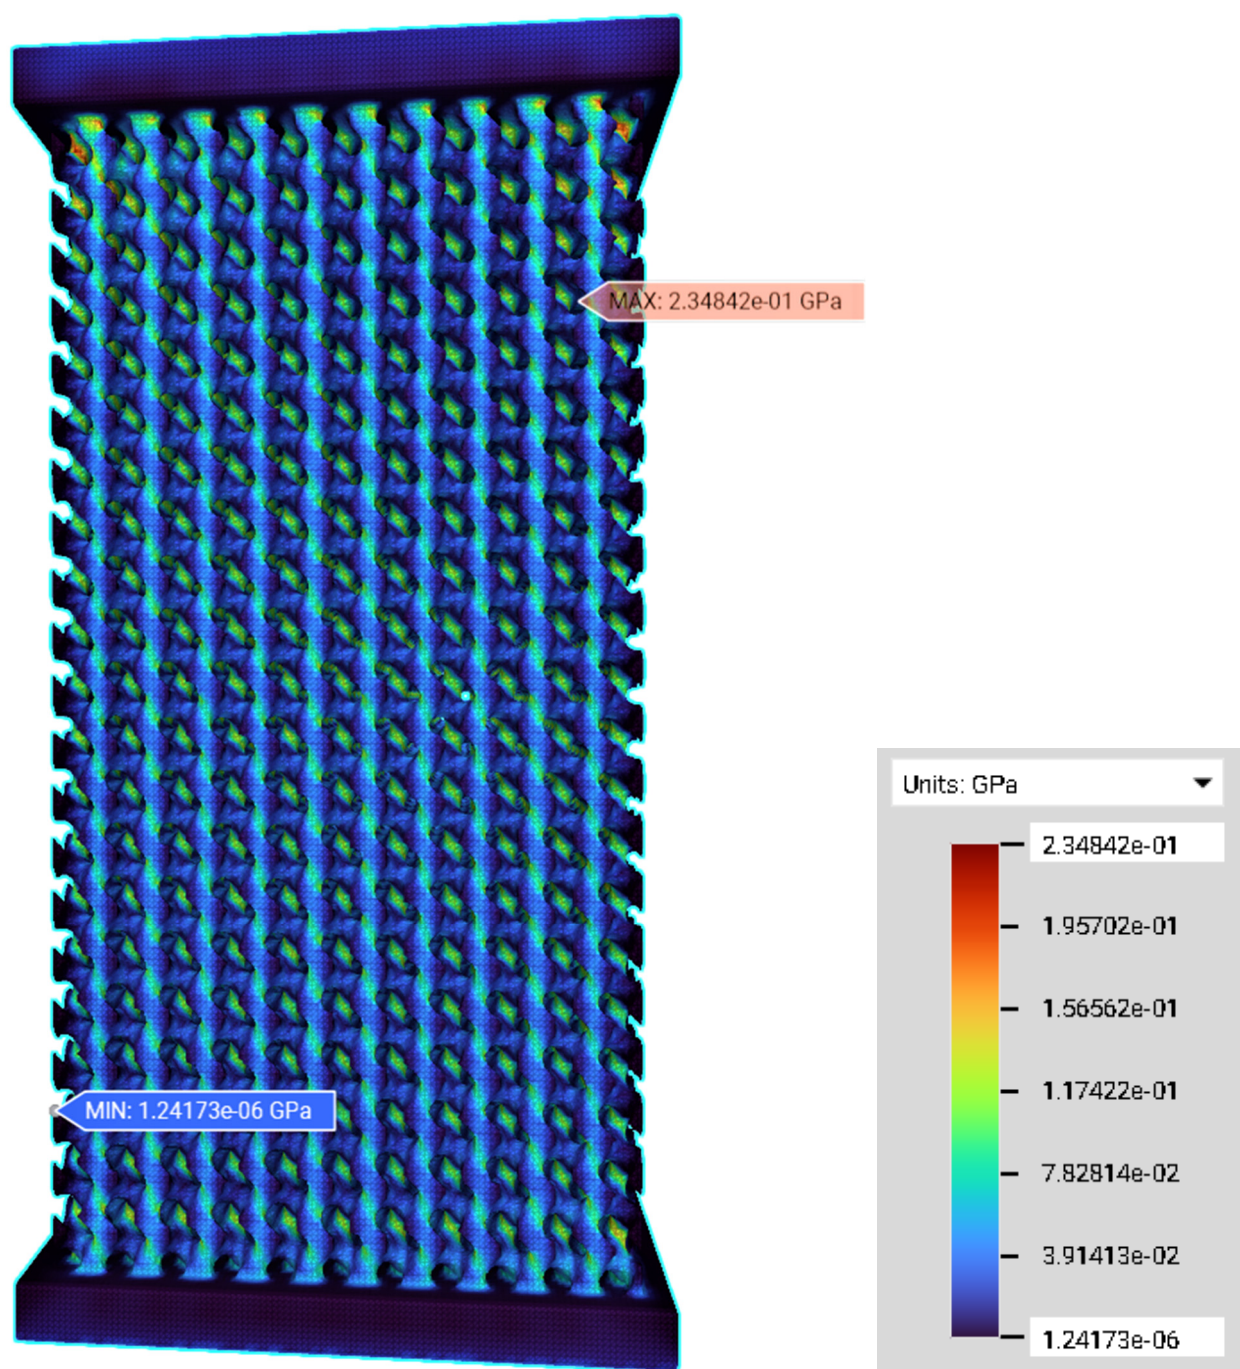

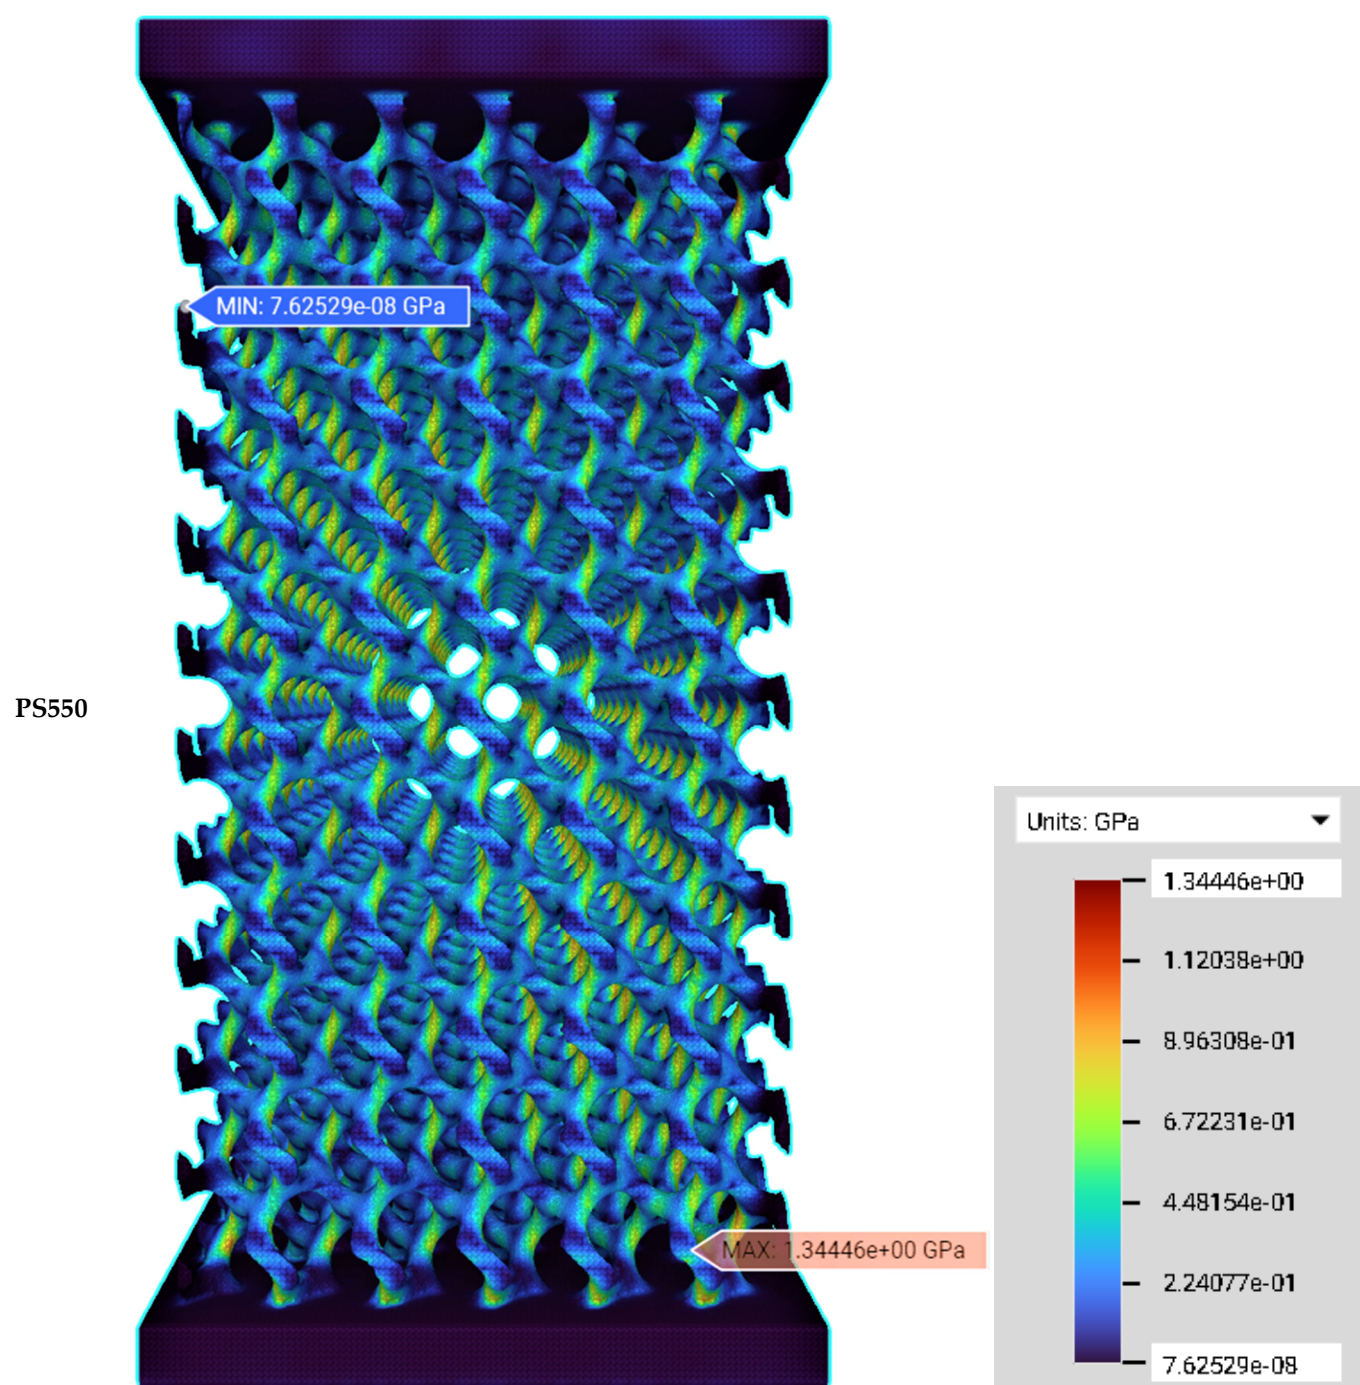



PS750

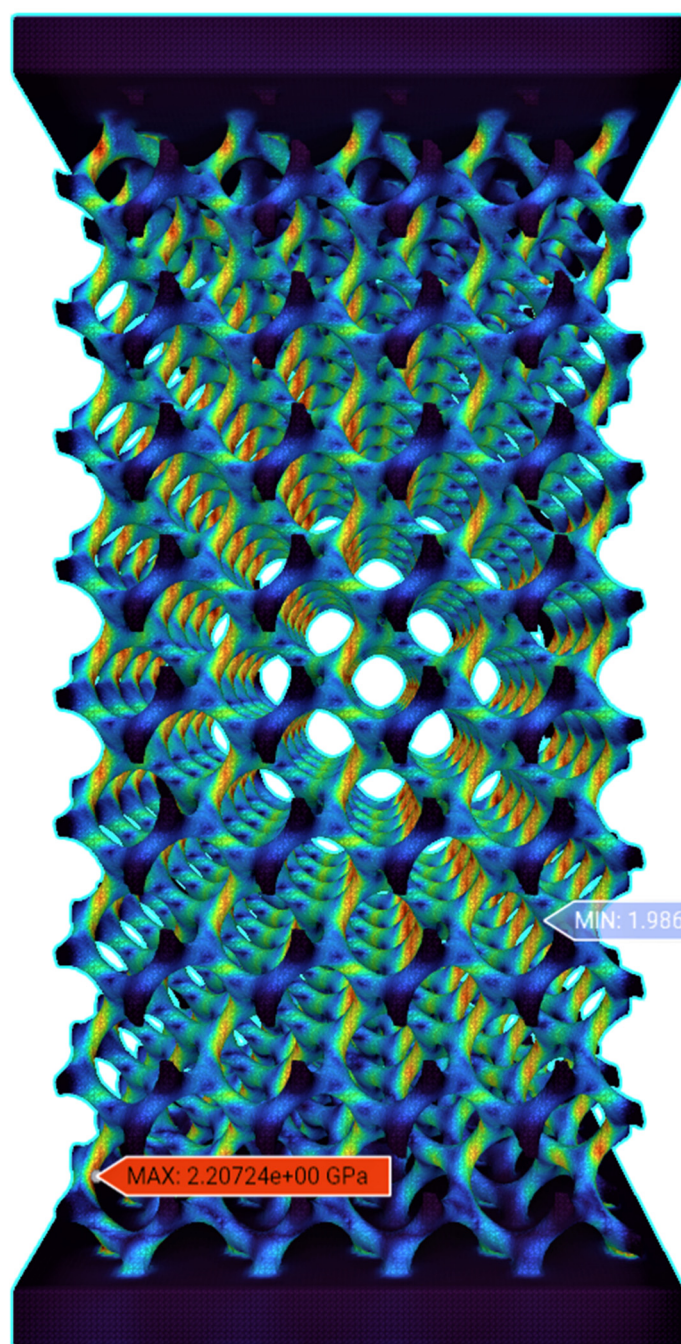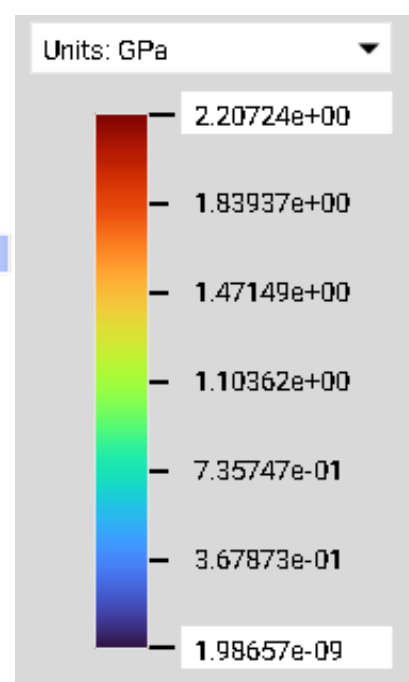

PS1000

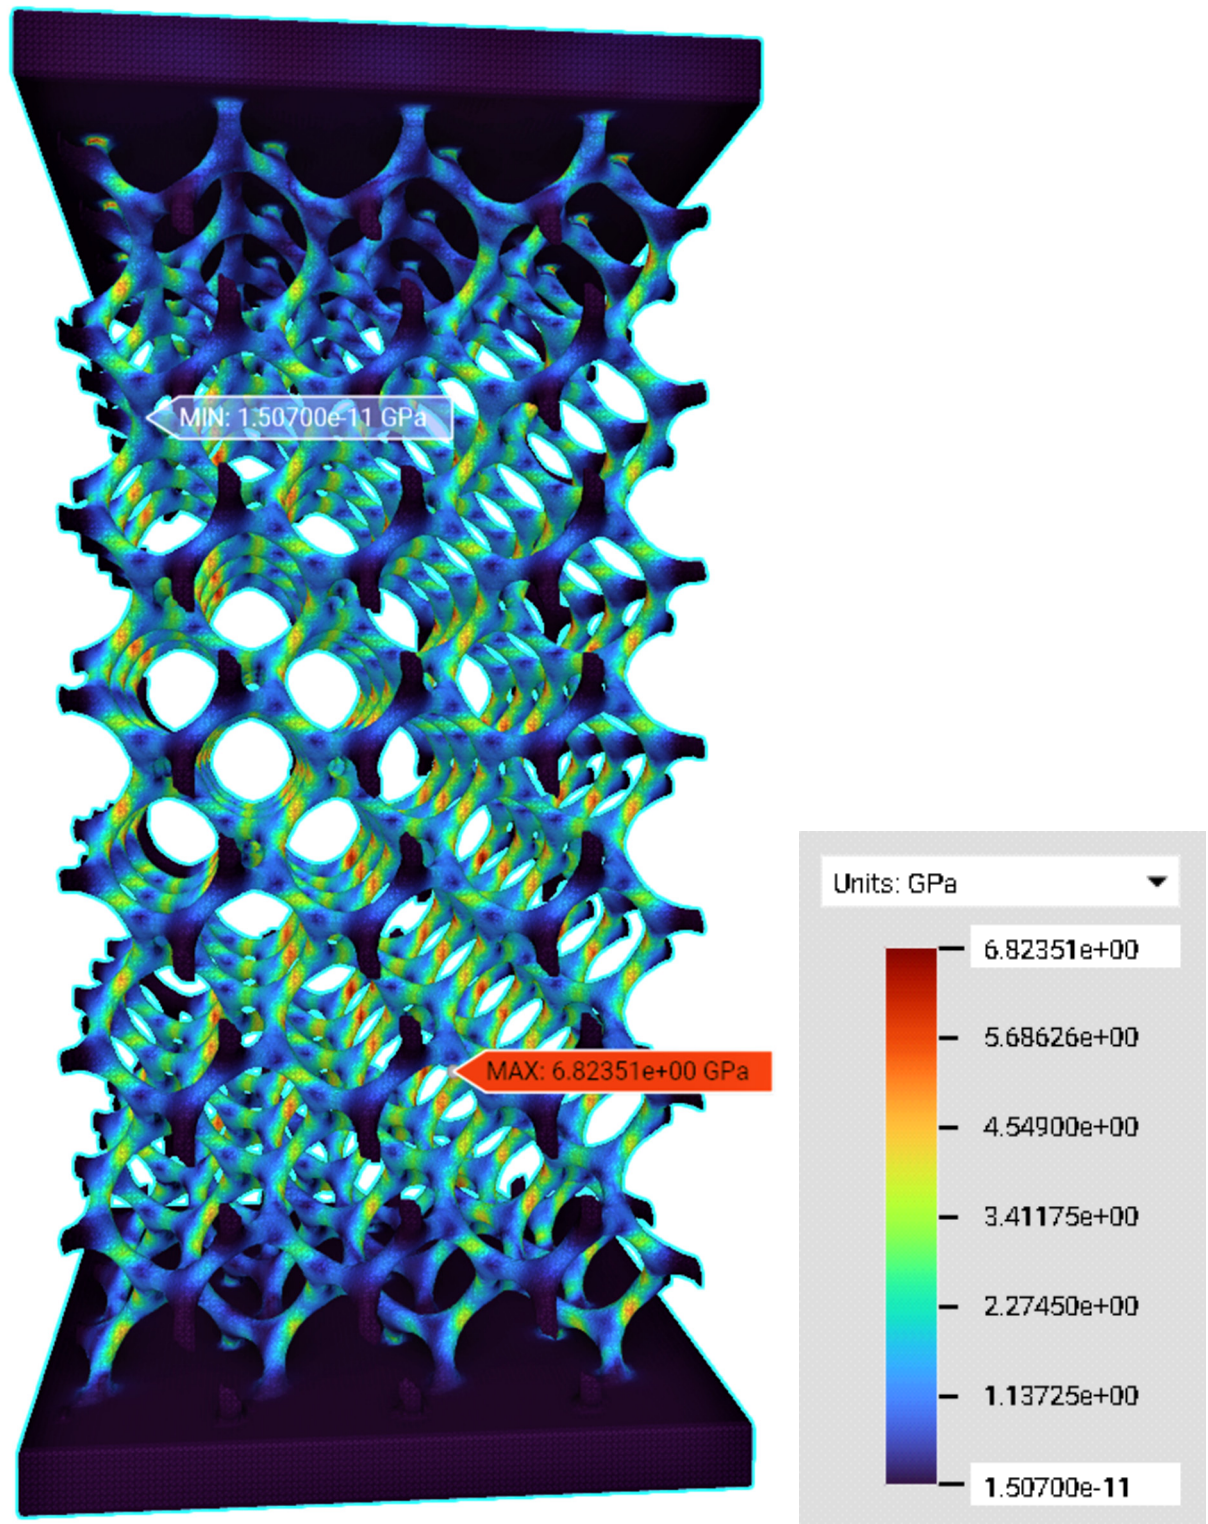



**Table S3.** Displacement contours of PS200, PS550, PS750, and PS1000 from the FE simulation. (Displacement contour of PS350 in the main article)

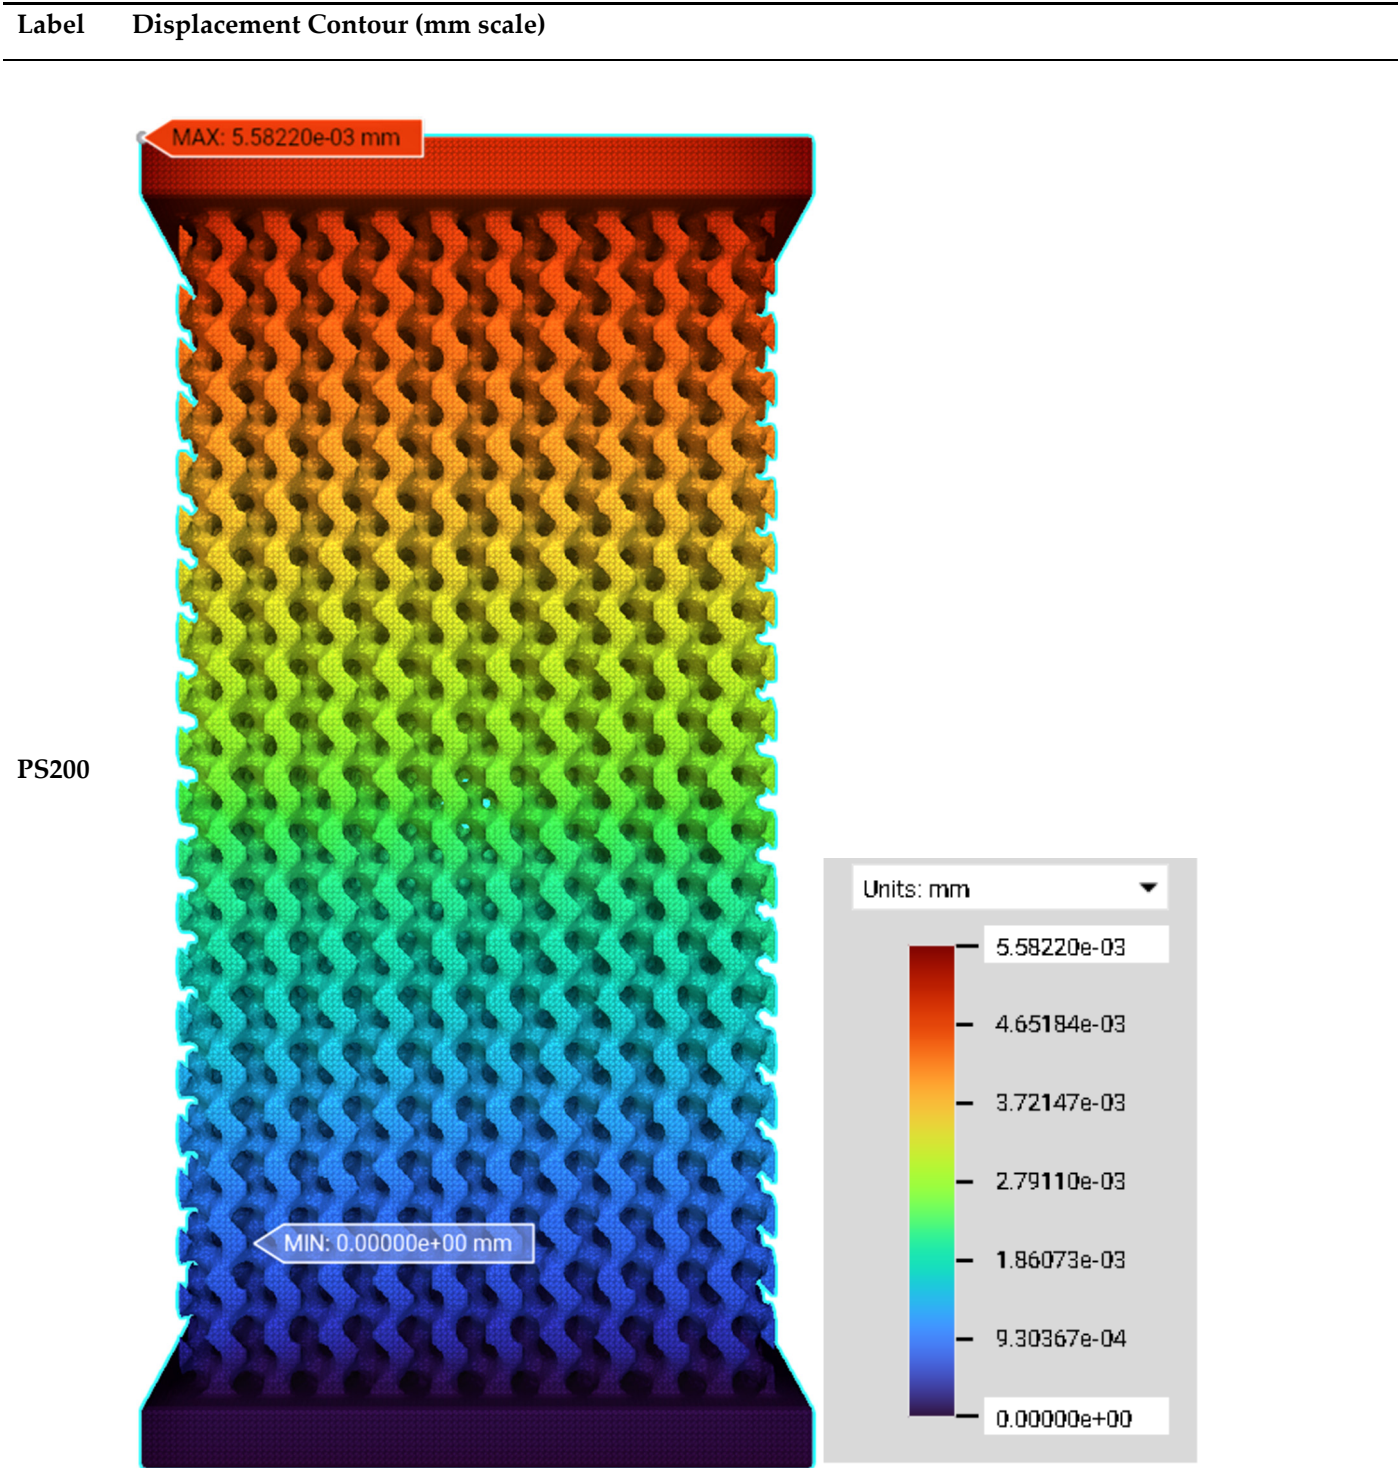

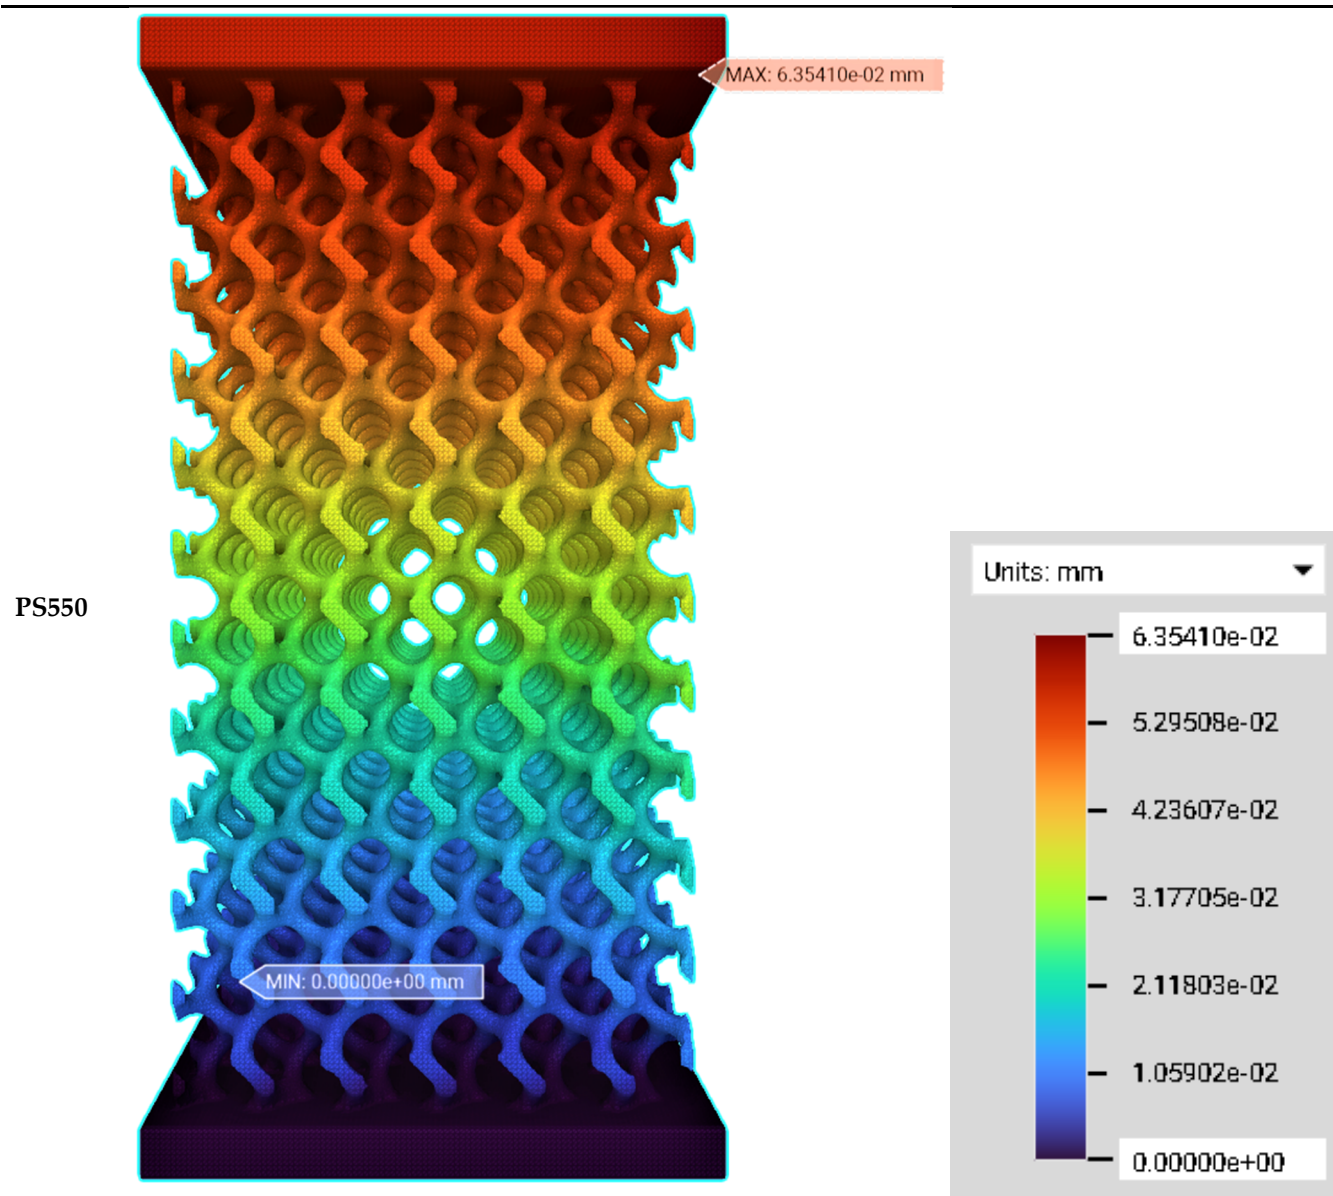



PS750

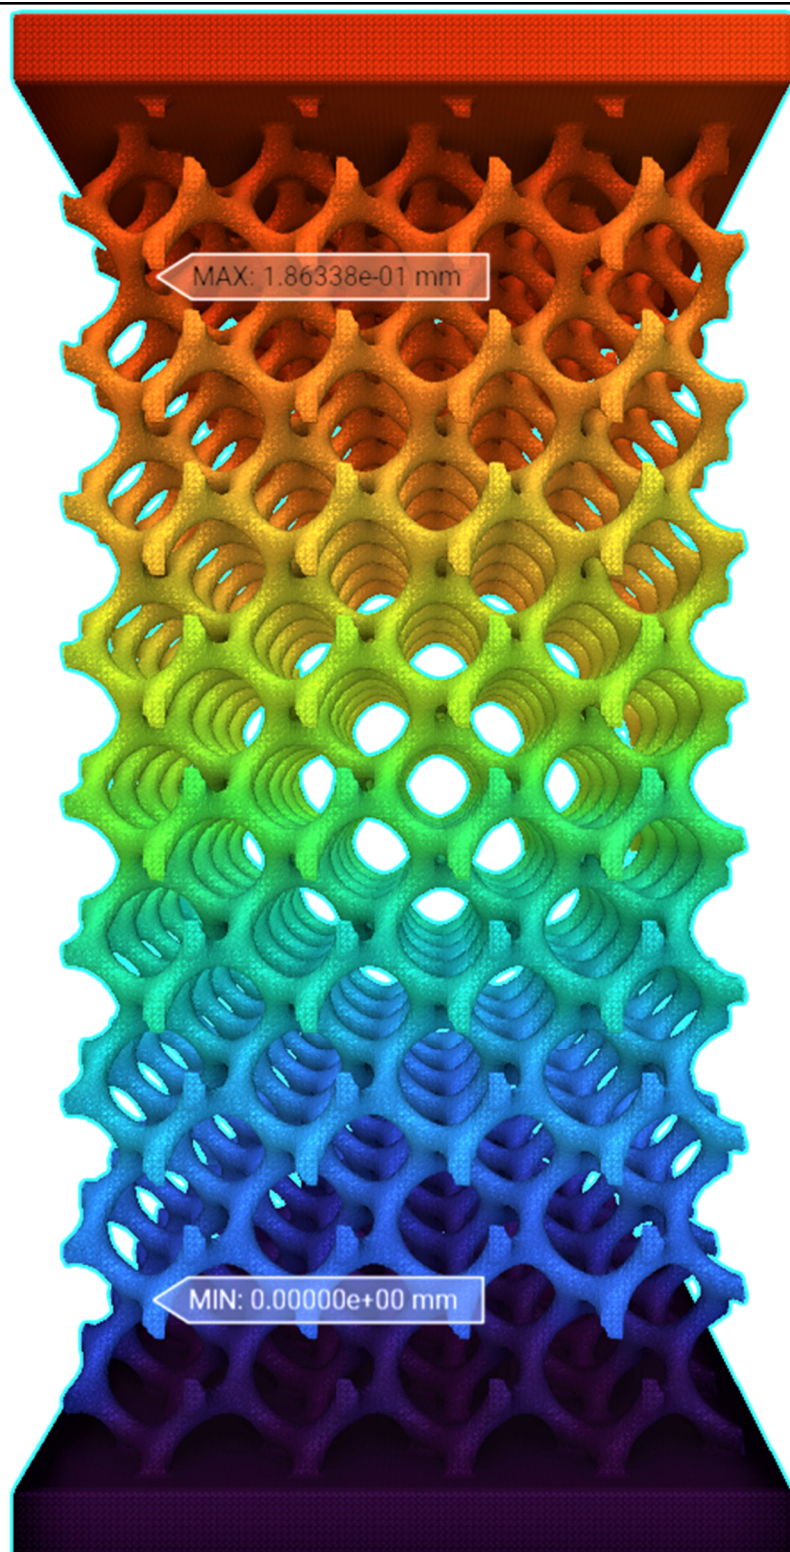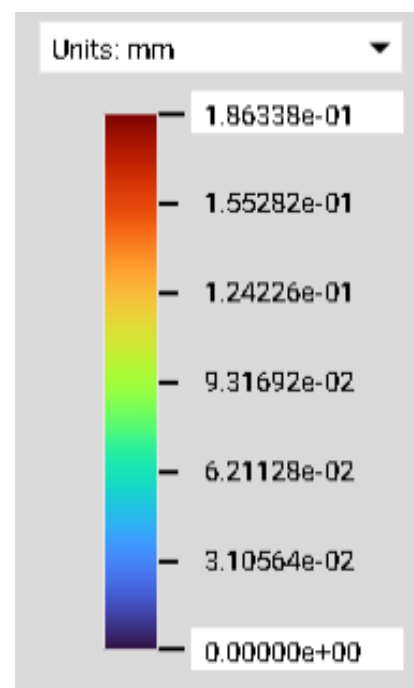

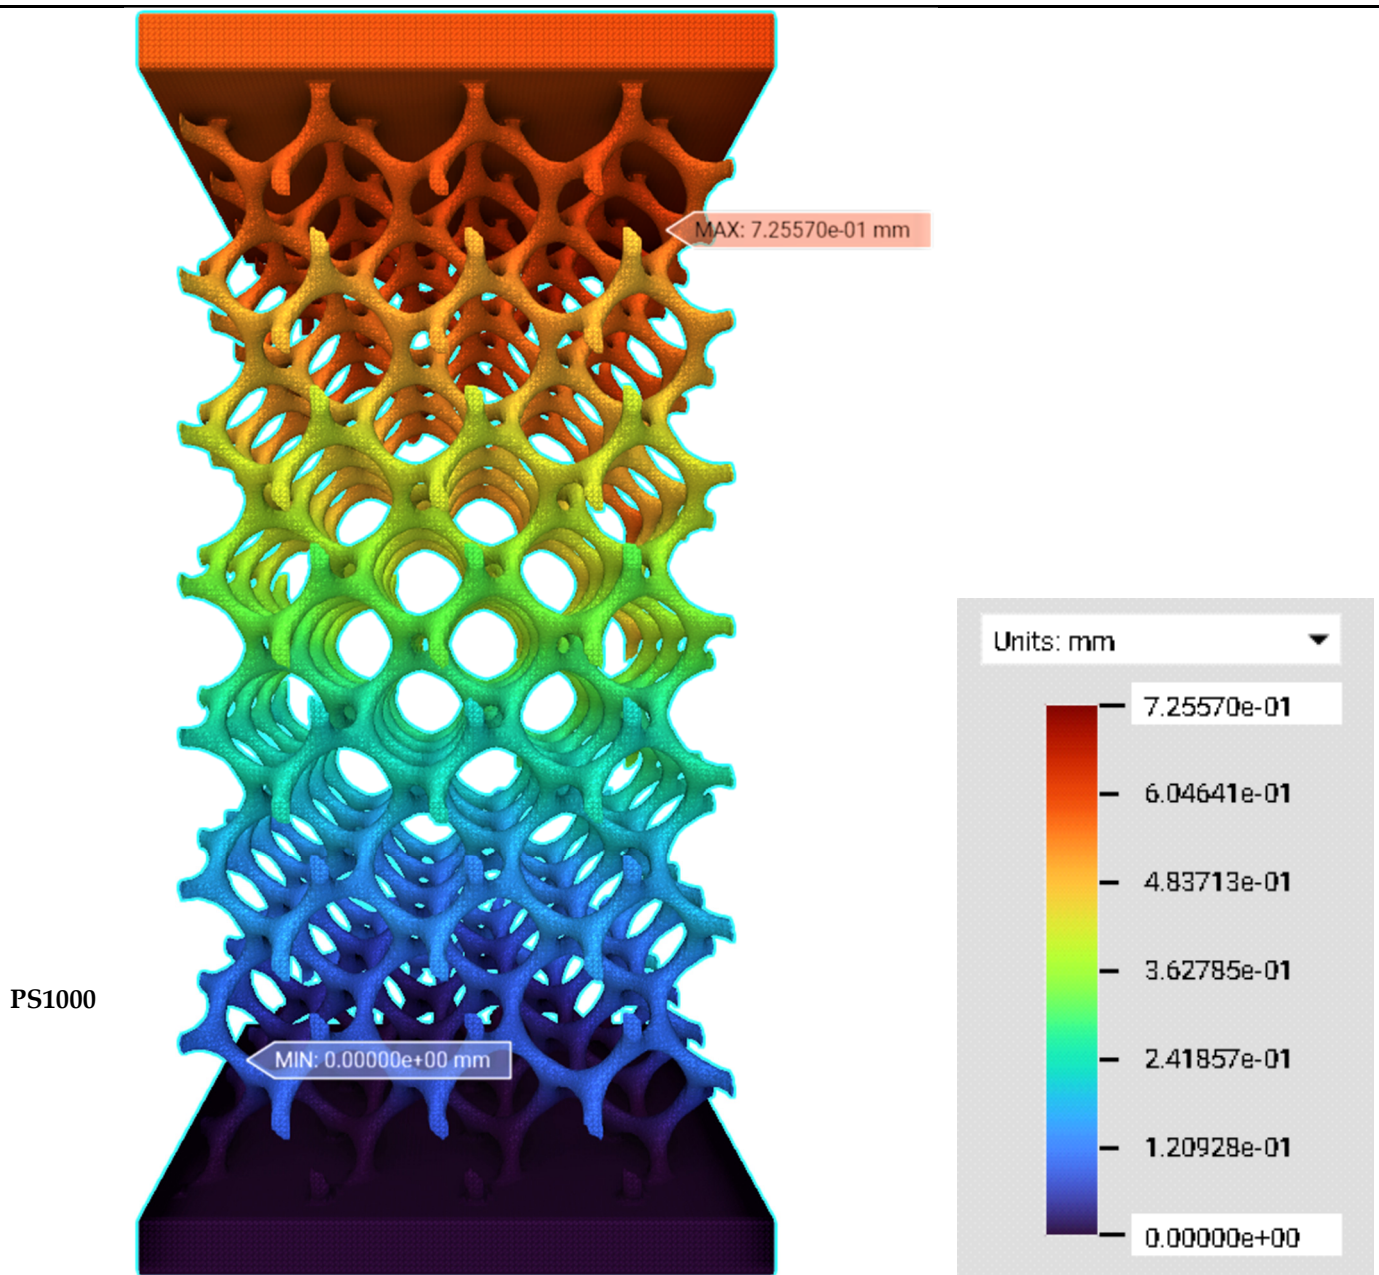

31  
32  
33  
34  
35
